# Supplementary material for: Venous Thromboembolism in Hospitalized Critical and Noncritical COVID-19 Patients: A Systematic Review and Meta-analysis
Source: PubMed Central journal article supplement (PMC8260281; doi:10.1055/s-0041-1730967), 2021-07-06
Supplement: 10-1055-s-0041-1730967-s210023.pdf [file 10-1055-s-0041-1730967-s210023.pdf]

## Search Strategy

- 1-Covid or (coronavirus)
- 2-Coagulopathy OR (disseminated intravascular coagulation) OR hemostasis
- 3-Thrombosis OR (deep vein thrombosis) OR (pulmonary embolism) OR (venous thromboembolism)
- 4-#1 AND (#2 OR #3)
- 5-1/1/2020 to 13/11/2020
- 6-#4 AND #5

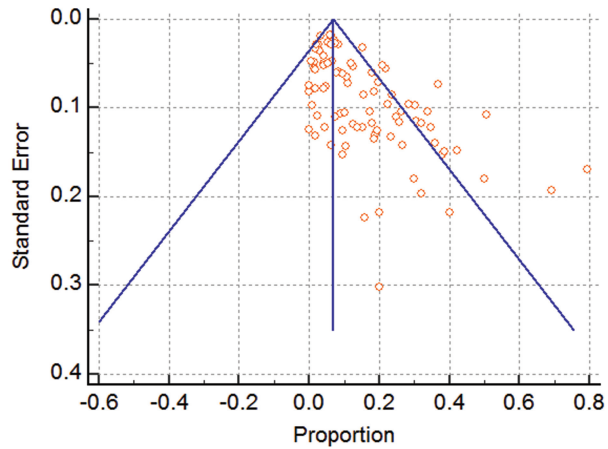

Supplementary Figure S1 Funnel Plot for all patients

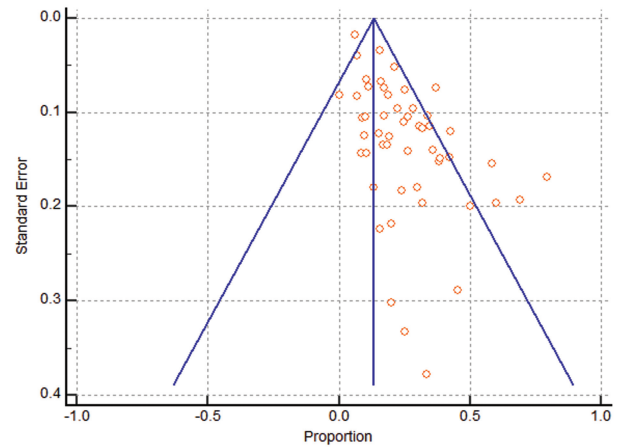

Supplementary Figure S2 Funnel Plot for ICU patients

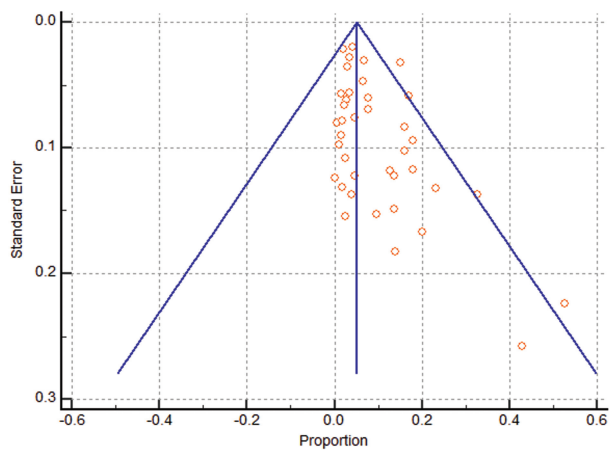

Supplementary Figure S3 Funnel Plot for non-ICU patients

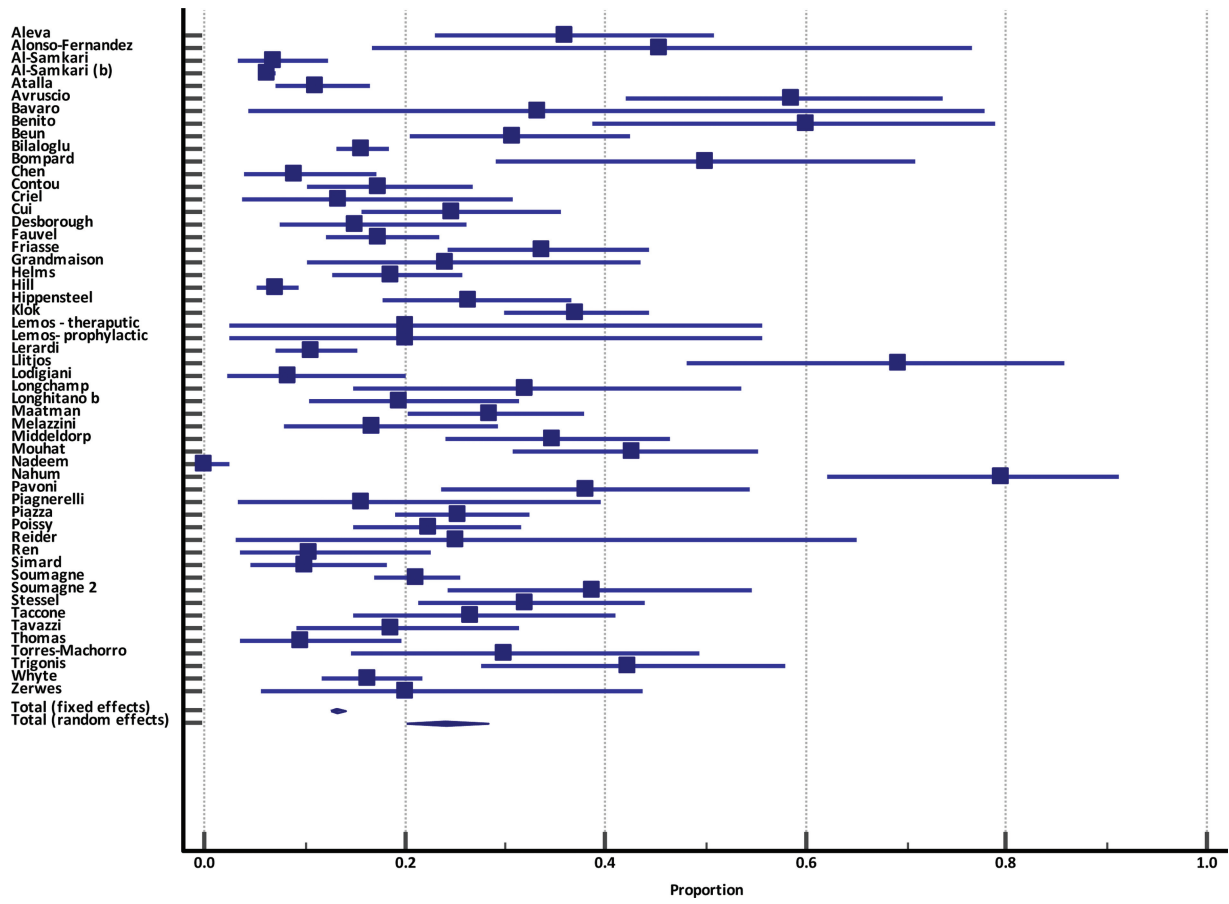

Supplementary Figure S4 Forest Plot showing proption of ICU patients with VTE.  $I^2$  value of 93.80%, CI (92.60 to 94.81)

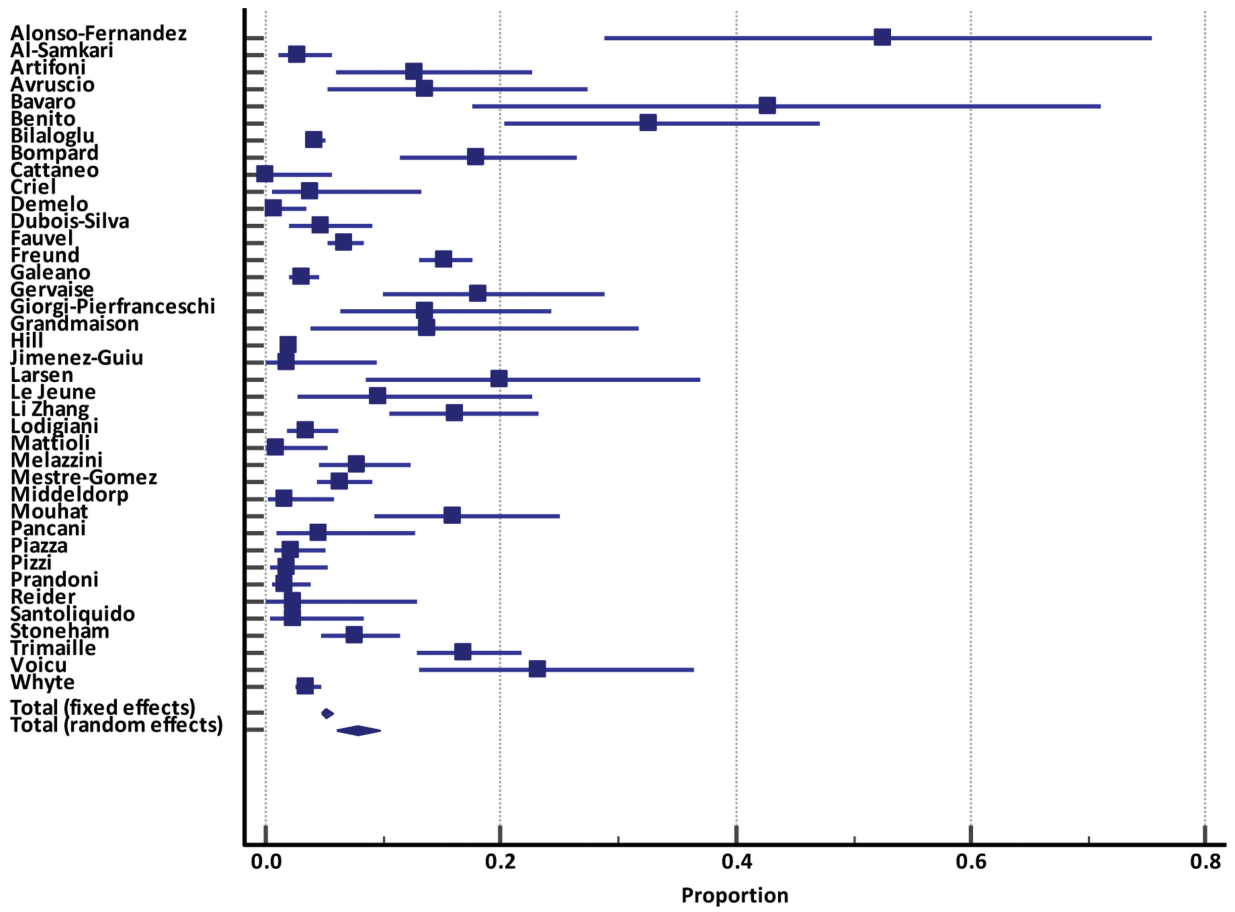

Supplementary Figure S5 Forest Plot showing proportion of non-ICU patients with VTE.  $I^2$  value of 92.46%, CI (90.61 to 93.95)

**Supplementary Table S1** Study design and setting

| Author                        | Country     | Sample Size | Study design                      | Health care settings            | VTE screening | Prophylaxis regimen                                                         | VTE (%) | PE (%) | DVT (%) |
|-------------------------------|-------------|-------------|-----------------------------------|---------------------------------|---------------|-----------------------------------------------------------------------------|---------|--------|---------|
| Al-Samkari <sup>1</sup>       | USA         | 400         | Retrospective cohort study        | Hospitalized                    | No            | 90% on prophylactic anticoagulation                                         | 4.3     | 2.5    | 2.5     |
| Artifoni <sup>2</sup>         | France      | 71          | Retrospective cohort study        | Non-ICU, with ultrasound        | Yes           | 99% on prophylactic anticoagulation                                         | 12.7    | 9.9    | 2.8     |
| Beun <sup>3</sup>             | Netherlands | 75          | Prospective Cohort study          | ICU                             | No            | NR                                                                          | 30.7    | 26.7   | 4       |
| Bilaloglu <sup>4</sup>        | USA         | 3334        | Retrospective cohort study        | Hospitalized                    | No            | Most patients on prophylactic anticoagulation                               | 6.1     | 3.2    | 3.9     |
| Bompard <sup>5</sup>          | France      | 135         | Retrospective cohort study        | Hospitalized, with CTPA         | No            | Prophylactic dose in non-ICU patients and intermediate dose in ICU patients | 23.7    | 23.7   | 0       |
| Chen <sup>6</sup>             | China       | 88          | Retrospective cohort study        | ICU, with U/S                   | yes           | Prophylactic anticoagulation                                                | 9.1     | 0      | 9.1     |
| Cui <sup>7</sup>              | China       | 81          | Retrospective cohort study        | ICU                             | No            | No anticoagulation                                                          | 24.7    | 0      | 24.7    |
| Demelo-Rodriguez <sup>8</sup> | Spain       | 156         | Prospective cohort study          | Non-ICU, D-Dimer >1000          | Yes           | 100% on prophylactic anticoagulation                                        | 0.6     | 0      | 0.6     |
| Desborough <sup>9</sup>       | UK          | 66          | Retrospective cohort study        | ICU                             | No            | 100% on prophylactic anticoagulation                                        | 15.2    | 7.6    | 9.1     |
| Dubois-Silva <sup>10</sup>    | Spain       | 171         | Cross-sectional observation study | Non-ICU                         | No            | 100% on prophylactic anticoagulation                                        | 4.7     | 4.7    | 0       |
| Fauvel <sup>11</sup>          | France      | 1240        | Retrospective cohort study        | Hospitalized, with CTPA         | Yes           | 63% on prophylactic dose and 8.4% on intermediate dose                      | 8.3     | 8.3    | 1.5     |
| Freund <sup>12</sup>          | 6 countries | 974         | Retrospective cohort study        | ER patients who had CTPA        | Yes           | No anticoagulation                                                          | 15.2    | 15.2   | 0       |
| Fraissé <sup>13</sup>         | France      | 92          | Retrospective cohort study        | ICU                             | No            | 47% on prophylactic dose and 53% on full dose                               | 33.7    | 27.2   | 13      |
| Gervaise <sup>14</sup>        | France      | 72          | Retrospective cohort study        | ER, with CTPA                   | Yes           | No anticoagulation                                                          | 18.0    | 18.1   | 0       |
| Helms <sup>15</sup>           | France      | 150         | Prospective cohort study          | ICU                             | No            | Prophylactic dose                                                           | 18.7    | 16.7   | 2       |
| Hippensteel <sup>16</sup>     | USA         | 91          | Retrospective cohort study        | ICU                             | NR            | NR                                                                          | 26.4    | 5.5    | 20.9    |
| Klok <sup>17</sup>            | Netherlands | 184         | Prospective cohort study          | ICU                             | No            | Prophylactic dose                                                           | 36.9    | 35.3   | 1.6     |
| Koleilat <sup>18</sup>        | USA         | 135         | Retrospective case control study  | Hospitalized                    | No            | Multiple doses administered                                                 | 15.6    | 2.2    | 13.3    |
| Larsen <sup>19</sup>          | France      | 35          | Prospective cohort study          | Hospitalized returned travelers | yes           | NR                                                                          | 4.2     | 3.0    | 1.2     |
| Litjos <sup>20</sup>          | Italy       | 26          | Retrospective cohort study        | ICU                             | Yes           | 31% had prophylactic anticoagulation and 69% had full dose                  | 69.2    | 23.1   | 69.2    |
| Lodigiani <sup>21</sup>       | Italy       | 362         | Retrospective cohort study        | Hospitalized                    | No            | Multiple doses administered                                                 | 4.1     | 2.8    | 1.4     |
| Longchamp <sup>22</sup>       | Switzerland | 25          | Retrospective cohort study        | ICU                             | Yes           | Prophylactic anticoagulation                                                | 32      | 20     | 24      |
| Mestre-Gomez <sup>23</sup>    | Spain       | 452         | Retrospective cohort study        | Non-ICU                         | No            | Prophylactic anticoagulation                                                | 6.4     | 6.4    | 0       |
| Monfardini <sup>24</sup>      | Italy       | 1207        | Case series                       | Hospitalized                    | No            | Prophylactic anticoagulation                                                | 2.2     | 2.2    | 0.3     |

(Continued)

**Supplementary Table S1 (Continued)**

| Author                       | Country            | Sample Size | Study design                 | Health care settings        | VTE screening | Prophylaxis regimen                                                                              | VTE (%) | PE (%) | DVT (%) |
|------------------------------|--------------------|-------------|------------------------------|-----------------------------|---------------|--------------------------------------------------------------------------------------------------|---------|--------|---------|
| Nahum <sup>25</sup>          | France             | 34          | Case series                  | ICU                         | Yes           | Prophylactic anticoagulation                                                                     | 79.4    | 0      | 79.4    |
| Patell <sup>26</sup>         | USA                | 398         | Retrospective cohort study   | Hospitalized                | NR            | Multiple doses administered                                                                      | 5.3     | 1.8    | 3.5     |
| Poissy <sup>27</sup>         | France             | 107         | Cross sectional              | ICU                         | No            | Prophylactic anticoagulation                                                                     | 22.4    | 20.7   | 4.7     |
| Poyiadji <sup>28</sup>       | USA                | 328         | Retrospective cohort study   | 328 Hospitalized, with CTPA | Yes           | NR                                                                                               | 21.9    | 21.9   | 0       |
| Rieder <sup>29</sup>         | Germany            | 49          | Prospective Cohort study     | Hospitalized                | No            | NR                                                                                               | 6.1     | 4.1    | 2.0     |
| Ren <sup>30</sup>            | China              | 48          | Cross-sectional study        | ICU                         | Yes           | Prophylactic anticoagulation                                                                     | 10.4    | 0      | 10.4    |
| Santoliquido <sup>31</sup>   | Italy              | 84          | Prospective Cohort study     | Non-ICU                     | yes           | Prophylactic anticoagulation                                                                     | 2.4     | 0      | 2.4     |
| Soumagne <sup>32</sup>       | France and Belgium | 375         | post hoc analysis of COVADIS | ICU                         | No            | NR                                                                                               | 21.1    | 14.7   | 9.3     |
| Stoneham <sup>33</sup>       | UK                 | 274         | Retrospective cohort study   | Non-ICU                     | No            | NR                                                                                               | 7.7     | 5.8    | 1.8     |
| Trigoni <sup>34</sup>        | USA                | 45          | Retrospective cohort study   | ICU, with U/S               | Yes           | Prophylactic anticoagulation                                                                     | 42.2    | 0      | 42.2    |
| Trimaille <sup>35</sup>      | France             | 273         | Retrospective cohort study   | Non-ICU                     | No            | Prophylactic anticoagulation                                                                     | 17.9    | 15.4   | 4.4     |
| Voicu <sup>36</sup>          | France             | 56          | Prospective cohort study     | ICU                         | Yes           | Prophylactic anticoagulation                                                                     | 23.2    | 0      | 23.2    |
| Whyte <sup>37</sup>          | UK                 | 1477        | Retrospective cohort study   | Hospitalized                | No            | Prophylactic anticoagulation                                                                     | 5.4     | 5.4    | 0       |
| Zerwes <sup>38</sup>         | Germany            | 20          | Prospective cohort study     | ICU                         | Yes           | Prophylactic anticoagulation                                                                     | 20      | 0      | 20      |
| Li Zhang <sup>39</sup>       | China              | 66          | Cross sectional study        | Non-ICU, with U/S           | No            | NR                                                                                               | 34.8    | 0      | 34.8    |
| Maatman <sup>40</sup>        | USA                | 109         | Case series                  | ICU                         | No            | Prophylactic anticoagulation                                                                     | 28.4    | 4.6    | 27.5    |
| Thomas <sup>41</sup>         | UK                 | 63          | Retrospective cohort study   | ICU                         | No            | Prophylactic anticoagulation                                                                     | 9.5     | 7.9    | 1.6     |
| Grillet <sup>42</sup>        | France             | 280         | Retrospective cohort study   | Hospitalized                | No            | NR                                                                                               | 8.2     | 8.2    | 0       |
| Alharthy <sup>43</sup>       | Saudi Arabia       | 89          | Prospective cohort study     | ICU                         | Yes           | NR                                                                                               | 0       | 24.7   | 16.9    |
| Hanif <sup>44</sup>          | USA                | 921         | Retrospective cohort study   | Hospitalized                | No            | Multiple doses administered                                                                      | 1.7     | 0      | 0       |
| Le Jeune <sup>45</sup>       | France             | 42          | Retrospective cohort study   | Non-ICU                     | Yes           | Multiple doses administered (60% on prophylactic dose, 23% on intermediate and 17% on full dose) | 9.5     | 9.5    | 2.4     |
| Leonard-Iorant <sup>46</sup> | France             | 106         | Retrospective cohort study   | Hospitalized, with CTPA     | Yes           | NR                                                                                               | 30.2    | 30.2   | 0       |
| Aleva <sup>47</sup>          | Netherlands        | 50          | Case series                  | ICU                         | No            | Prophylactic anticoagulation                                                                     | 36      | 26     | 14      |
| Ierardi <sup>48</sup>        | Italy              | 234         | Prospective cohort study     | Hospitalized                | Yes           | Prophylactic anticoagulation                                                                     | 10.7    | 0      | 10.7    |
| Bavaro <sup>49</sup>         | Italy              | 20          | Case series                  | Hospitalized, with CTPA     | Yes           | Prophylactic anticoagulation                                                                     | 40      | 40     | 0       |
| Crie <sup>50</sup>           | Belgium            | 82          | Prospective cohort study     | Hospitalized                | Yes           | Prophylactic anticoagulation                                                                     | 7.3     | 0      | 7.3     |
| Mattoli <sup>51</sup>        | Italy              | 105         | Retrospective cohort study   | Non-ICU                     | No            | Intermediate dose anticoagulation                                                                | 0.95    | 0.9    | 0       |
| Middledrop <sup>52</sup>     | Netherlands        | 198         | Retrospective cohort study   | Hospitalized                | No            | Non-ICU on prophylactic dose and ICU patients on intermediate dose                               | 19.7    | 6.6    | 13.1    |
| Piagnerelli <sup>53</sup>    | Belgium            | 19          | Prospective cohort study     | ICU                         | NR            | Intermediate dose anticoagulation                                                                | 15.8    | 0      | 0       |

Supplementary Table S1 (Continued)

| Author                              | Country     | Sample Size | Study design                               | Health care settings                     | VTE screening | Prophylaxis regimen                                                                               | VTE (%) | PE (%) | DVT (%) |
|-------------------------------------|-------------|-------------|--------------------------------------------|------------------------------------------|---------------|---------------------------------------------------------------------------------------------------|---------|--------|---------|
| Stessel <sup>54</sup>               | Belgium     | 72          | Before and after study                     | ICU                                      | Yes           | Before: prophylactic dose, After: full dose anticoagulation                                       | 31.9    | 0      | 31.9    |
| Taccone <sup>55</sup>               | Belgium     | 49          | Retrospective analysis of prospective data | ICU                                      | No            | Multiple doses administered (45% on prophylactic dose and 37% on intermediate dose)               | 26.5    | 26.5   | 0       |
| Tavazzi <sup>56</sup>               | Italy       | 54          | Prospective cohort study                   | ICU                                      | NR            | Prophylactic anticoagulation                                                                      | 18.5    | 3.7    | 14.8    |
| Bi <sup>57</sup>                    | China       | 420         | Prospective cohort study                   | Hospitalized                             | NR            | NR                                                                                                | 1.4     | 0      | 1.4     |
| Cattaneo <sup>58</sup>              | Italy       | 64          | Prospective cohort study                   | Non-ICU                                  | Yes           | Prophylactic anticoagulation                                                                      | 0       | 0      | 0       |
| Galeano-Valle <sup>59</sup>         | Spain       | 785         | Prospective cohort study                   | Non-ICU                                  | No            | Prophylactic anticoagulation                                                                      | 3.1     | 1.9    | 1.7     |
| Grandmaison <sup>60</sup>           | Switzerland | 58          | Cross sectional study                      | Hospitalized                             | Yes           | Prophylactic anticoagulation                                                                      | 18.9    | 6.9    | 12.1    |
| Giorgi-Pierfranceschi <sup>61</sup> | Italy       | 66          | Cross sectional study                      | Non-ICU with U/S                         | Yes           | Prophylactic anticoagulation                                                                      | 13.6    | 0      | 13.6    |
| Contou <sup>62</sup>                | France      | 92          | Retrospective cohort study                 | ICU                                      | No            | Prophylactic anticoagulation                                                                      | 17.4    | 17.4   | 0       |
| Alonso-Fernández <sup>63</sup>      | Spain       | 30          | Prospective cohort study                   | Hospitalized, with high D-Dimer and CTPA | Yes           | Prophylactic anticoagulation                                                                      | 50      | 50     | 0       |
| Benito <sup>64</sup>                | Spain       | 1275        | Prospective cohort study                   | Hospitalized                             | Yes           | Prophylactic anticoagulation                                                                      | 2.5     | 2.5    | 0       |
| Atalla <sup>65</sup>                | UAE         | 188         | Retrospective cohort study                 | ICU, U/S if D-Dimer high                 | Yes           | Multiple doses administered                                                                       | 11.2    | 4.8    | 6.4     |
| Avuscio <sup>66</sup>               | Italy       | 85          | Prospective cohort study                   | Hospitalized                             | Yes           | Multiple doses administered based on ROTEM                                                        | 50.6    | 4.7    | 30.6    |
| CHOI <sup>67</sup>                  | USA         | 1739        | Retrospective cohort study                 | Hospitalized                             | No            | Multiple doses administer (changed after April to intermediate dose)                              | 7.1     | 2.4    | 5.5     |
| Hill <sup>68</sup>                  | USA         | 2748        | Retrospective cohort study                 | Hospitalized                             | No            | Prophylactic anticoagulation in patient with high Padua score                                     | 3.1     | 1.3    | 1.5     |
| Jimenez-Guiu <sup>69</sup>          | Spain       | 57          | Prospective cohort study                   | Non-ICU                                  | Yes           | Multiple doses administered                                                                       | 1.8     | 0      | 1.8     |
| Lemos <sup>70</sup>                 | Brazil      | 20          | Randomized controlled trial                | ICU                                      | No            | One prophylactic arm and one full dose arm                                                        | 20      | 5      | 15      |
| Longhitano <sup>71</sup>            | Italy       | 62          | Retrospective cohort study                 | ICU                                      | NR            | Intermediate dose anticoagulation                                                                 | 19.4    | 17.7   | 1.6     |
| Longhitano <sup>72</sup>            | Italy       | 74          | Prospective cohort study                   | Non-ICU                                  | Yes           | Multiple doses administered                                                                       | 25.7    | 12.2   | 13.5    |
| Melazzini <sup>73</sup>             | Italy       | 259         | Retrospective cohort study                 | Hospitalized                             | No            | 92% on prophylactic anticoagulation                                                               | 9.7     | 1.5    | 8.1     |
| Mouhat <sup>74</sup>                | France      | 349         | Retrospective cohort study                 | Hospitalized                             | No            | Multiple doses administered                                                                       | 12.6    | 12.6   | 0       |
| Nadeem <sup>75</sup>                | UAE         | 149         | Retrospective cohort study                 | ICU                                      | No            | Multiple doses administered in the same patient                                                   | 0       | 0      | 0       |
| Pancani <sup>76</sup>               | Italy       | 66          | Prospective cohort study                   | Non-ICU                                  | Yes           | Prophylactic anticoagulation                                                                      | 4.5     | 1.5    | 3.0     |
| Pavoni <sup>77</sup>                | Italy       | 42          | Retrospective cohort study                 | ICU                                      | Yes           | Multiple doses administered (intermediate dose if D-Dimer < 3000 and full dose if D-Dimer > 3000) | 38.1    | 7.1    | 30.9    |

(Continued)

**Supplementary Table S1** (Continued)

| Author                        | Country   | Sample Size | Study design               | Health care settings | VTE screening | Prophylaxis regimen                                                              | VTE (%) | PE (%) | DVT (%) |
|-------------------------------|-----------|-------------|----------------------------|----------------------|---------------|----------------------------------------------------------------------------------|---------|--------|---------|
| Piazza <sup>78</sup>          | USA       | 399         | Retrospective cohort study | Hospitalized         | No            | Prophylactic anticoagulation                                                     | 12.0    | 2.0    | 10.0    |
| Pizzi <sup>79</sup>           | Italy     | 162         | Retrospective cohort study | Non-ICU              | Yes           | No anticoagulation, screening done on admission                                  | 1.9     | 0      | 1.9     |
| Prandoni <sup>80</sup>        | Italy     | 308         | Retrospective cohort study | Non-ICU              | No            | Prophylactic anticoagulation                                                     | 1.6     | 0.6    | 0.9     |
| Soumagne <sup>281</sup>       | France    | 44          | Retrospective cohort study | ICU, with CTPA       | Yes           | Multiple doses administered                                                      | 38.6    | 38.5   | 0       |
| Torres-Machorro <sup>82</sup> | Mexico    | 30          | Prospective cohort study   | ICU                  | Yes           | Multiple doses administered based on Padua score (intermediate and prophylactic) | 30      | 0      | 30      |
| Al-samkari <sup>283</sup>     | USA       | 3239        | Retrospective cohort study | ICU with D-Dimer     | NR            | Multiple doses administered                                                      | 6.3     | 0      | 0       |
| berg <sup>84</sup>            | USA       | 2180        | Retrospective cohort study | Hospitalized         | NR            | Multiple doses administered                                                      | 6.1     | 0      | 0       |
| Marquez <sup>85</sup>         | Mexico    | 447         | Prospective cohort study   | Hospitalized         | No            | Multiple doses administered                                                      | 0.7     | 0.4    | 0.2     |
| Tan <sup>86</sup>             | Singapore | 181         | Retrospective cohort study | Hospitalized         | NR            | NR                                                                               | 0       | 0      | 0       |
| Warrior <sup>87</sup>         | USA       | 1265        | Prospective cohort study   | Hospitalized         | NR            | Multiple doses administered                                                      | 6.2     | 4.8    | 5.6     |
| Theprungsirikul <sup>88</sup> | USA       | 1352        | Retrospective cohort study | Hospitalized         | NR            | NR                                                                               | 7.5     | 3.3    | 5.1     |
| Camille <sup>89</sup>         | Canada    | 90          | Retrospective cohort study | ICU                  | NR            | Multiple doses administered                                                      | 10      | 10     | 3.3     |
| Kodama <sup>90</sup>          | USA       | 580         | Retrospective cohort study | Hospitalized         | NR            | Multiple doses administered                                                      | 4.1     | 0.7    | 3.4     |
| Jiménez-Soto <sup>91</sup>    | Mexico    | 322         | Cross sectional study      | hospitalized         | NR            | Multiple doses administered                                                      | 1.6     | 1.6    | 0       |

Abbreviations: CTPA, computed tomography pulmonary angiogram; DVT = Deep venous thrombosis; ICU, intensive care unit; NR, Not reported; PE, pulmonary embolism; U/S, ultrasonography; UAE, United Arab Emirates; USA, United States of America; VTE, venous thromboembolism.

**Supplementary Table S2** Quality of identified studies

| Author                        | Study design                      | Health care settings            | Selection | Compatibility | Outcome |
|-------------------------------|-----------------------------------|---------------------------------|-----------|---------------|---------|
| Al-Samkari <sup>1</sup>       | Retrospective cohort study        | Hospitalized                    | ****      | *             | **      |
| Artifoni <sup>2</sup>         | Retrospective cohort study        | Non-ICU, with ultrasound        | ***       | **            | *       |
| Beun <sup>3</sup>             | Prospective Cohort study          | ICU                             | ****      | *             | *       |
| Bilaloglu <sup>4</sup>        | Retrospective cohort study        | Hospitalized                    | ****      | **            | **      |
| Bompard <sup>5</sup>          | Retrospective cohort study        | Hospitalized, with CTPA         | ***       | *             | **      |
| Chen <sup>6</sup>             | Retrospective cohort study        | ICU                             | ***       | **            | *       |
| Cui <sup>7</sup>              | Retrospective cohort study        | ICU                             | ****      | **            | **      |
| Demeio-Rodriguez <sup>8</sup> | Prospective cohort study          | Non-ICU, D-Dimer > 1000         | ***       | *             | **      |
| Desborough <sup>9</sup>       | Retrospective cohort study        | ICU                             | ****      | **            | **      |
| Dubois-Silva <sup>10</sup>    | Cross-sectional observation study | Non-ICU                         | ****      | **            | *       |
| Fauvel <sup>11</sup>          | Retrospective cohort study        | Hospitalized, with CTPA         | ***       | *             | **      |
| Freund <sup>12</sup>          | Retrospective cohort study        | ER patients who had CTPA        | **        | *             | **      |
| Fraissé <sup>13</sup>         | Retrospective cohort study        | ICU                             | ****      | **            | **      |
| Gervaise <sup>14</sup>        | Retrospective cohort study        | ER, with CTPA                   | **        | *             | **      |
| Helms <sup>15</sup>           | Prospective cohort study          | ICU                             | ****      | **            | **      |
| Hippensteel <sup>16</sup>     | Retrospective cohort study        | ICU                             | ****      | **            | **      |
| Klok <sup>17</sup>            | Prospective cohort study          | ICU                             | ****      | **            | **      |
| Koleilat <sup>18</sup>        | Retrospective case control study  | Hospitalized                    | ****      | **            | **      |
| Larsen <sup>19</sup>          | Prospective cohort study          | Hospitalized returned travelers | **        | *             | **      |
| Llitos <sup>20</sup>          | Retrospective cohort study        | ICU                             | ****      | **            | **      |
| Lodigiani <sup>21</sup>       | Retrospective cohort study        | Hospitalized                    | ****      | **            | **      |
| Longchamp <sup>22</sup>       | Retrospective cohort study        | ICU                             | ****      | **            | **      |
| Mestre-Gomez <sup>23</sup>    | Retrospective cohort study        | Non-ICU                         | ****      | **            | **      |
| Monfardini <sup>24</sup>      | Case series                       | Hospitalized                    | ****      | **            | *       |
| Nahum <sup>25</sup>           | Case series                       | ICU                             | ***       | *             | **      |
| Patell <sup>26</sup>          | Retrospective cohort study        | Hospitalized                    | ****      | **            | **      |
| Poissy <sup>27</sup>          | Cross sectional                   | ICU                             | ****      | **            | **      |
| Poyiadji <sup>28</sup>        | Retrospective cohort study        | Hospitalized, with CTPA         | ***       | *             | **      |
| Rieder <sup>29</sup>          | Prospective Cohort study          | Hospitalized                    | ****      | **            | **      |
| Ren <sup>30</sup>             | Cross-sectional study             | ICU                             | ***       | **            | *       |
| Santoliquido <sup>31</sup>    | Prospective Cohort study          | Non-ICU                         | ***       | **            | **      |
| Soumagne <sup>32</sup>        | Post hoc analysis of COVADIS      | ICU                             | ****      | **            | **      |

(Continued)



**Supplementary Table S2** (Continued)

| Author                              | Study design                               | Health care settings    | Selection | Compatibility | Outcome |
|-------------------------------------|--------------------------------------------|-------------------------|-----------|---------------|---------|
| Stoneham <sup>33</sup>              | Retrospective cohort study                 | Non-ICU                 | ****      | **            | **      |
| Trigoni <sup>34</sup>               | Retrospective cohort study                 | ICU, with U/S           | ***       | *             | **      |
| Trimaille <sup>35</sup>             | Retrospective cohort study                 | Non-ICU                 | *****     | **            | **      |
| Voicu <sup>36</sup>                 | Prospective cohort study                   | ICU                     | *****     | **            | **      |
| Whyte <sup>37</sup>                 | Retrospective cohort study                 | Hospitalized            | *****     | **            | **      |
| Zerwes <sup>38</sup>                | Prospective cohort study                   | ICU                     | *****     | **            | **      |
| Li Zhang <sup>39</sup>              | Cross sectional study                      | Non-ICU, with U/S       | ***       | *             | **      |
| Maatman <sup>40</sup>               | Case series                                | ICU                     | *****     | **            | **      |
| Thomas <sup>41</sup>                | Retrospective cohort study                 | ICU                     | *****     | **            | **      |
| Grillet <sup>42</sup>               | Retrospective cohort study                 | Hospitalized            | *****     | **            | **      |
| Alharthy <sup>43</sup>              | Prospective cohort study                   | ICU                     | *****     | *             | **      |
| Hanif <sup>44</sup>                 | Retrospective cohort study                 | Hospitalized            | *****     | **            | **      |
| Le Jeune <sup>45</sup>              | Retrospective cohort study                 | Non-ICU                 | *****     | *             | **      |
| Leonard-Iorant <sup>46</sup>        | Retrospective cohort study                 | Hospitalized, with CTPA | ***       | *             | **      |
| Aleva <sup>47</sup>                 | Case series                                | ICU                     | *****     | **            | **      |
| Ierardi <sup>48</sup>               | Prospective cohort study                   | Hospitalized            | *****     | *             | **      |
| Bavaro <sup>49</sup>                | Case series                                | Hospitalized, with CTPA | ***       | *             | *       |
| Criel <sup>50</sup>                 | Prospective cohort study                   | Hospitalized            | ***       | **            | *       |
| Mattioli <sup>51</sup>              | Retrospective cohort study                 | Non-ICU                 | *****     | **            | **      |
| Middelrop <sup>52</sup>             | Retrospective cohort study                 | Hospitalized            | *****     | **            | **      |
| Piagnerelli <sup>53</sup>           | Prospective cohort study                   | ICU                     | ***       | **            | **      |
| Stessel <sup>54</sup>               | Before and after study                     | ICU                     | *****     | **            | **      |
| Taccone <sup>55</sup>               | Retrospective analysis of prospective data | ICU                     | ***       | **            | **      |
| Tavazzi <sup>56</sup>               | Prospective cohort study                   | ICU                     | ***       | **            | **      |
| Bi <sup>57</sup>                    | Prospective cohort study                   | Hospitalized            | *****     | **            | **      |
| Cattaneo <sup>58</sup>              | Prospective cohort study                   | Non-ICU                 | *****     | **            | **      |
| Galeano-Valle <sup>59</sup>         | Prospective cohort study                   | Non-ICU                 | *****     | **            | **      |
| Grandmaison <sup>60</sup>           | Cross sectional study                      | Hospitalized            | ***       | **            | *       |
| Giorgi-Pierfranceschi <sup>61</sup> | Cross sectional study                      | Non-ICU with U/S        | ***       | **            | *       |
| Contou <sup>62</sup>                | Retrospective cohort study                 | ICU                     | *****     | **            | **      |
| Alonso-Fernández <sup>63</sup>      | Prospective cohort study                   | Hospitalized, with CTPA | **        | *             | **      |
| Benito <sup>64</sup>                | Prospective cohort study                   | Hospitalized            | *****     | **            | **      |

Supplementary Table S2 (Continued)

| Author                        | Study design                | Health care settings     | Selection       | Compatibility | Outcome    |
|-------------------------------|-----------------------------|--------------------------|-----------------|---------------|------------|
| Atalla <sup>65</sup>          | Retrospective cohort study  | ICU, U/S if D-Dimer high | ***             | **            | **         |
| Avruscio <sup>66</sup>        | Prospective cohort study    | Hospitalized             | ****            | **            | **         |
| CHOI <sup>67</sup>            | Retrospective cohort study  | Hospitalized             | ****            | **            | **         |
| Hill <sup>68</sup>            | Retrospective cohort study  | Hospitalized             | ****            | **            | **         |
| Jimenez-Guiu <sup>69</sup>    | Prospective cohort study    | Non-ICU                  | ****            | **            | **         |
| Lemos <sup>70</sup>           | Randomized controlled trial | ICU                      | Randomization 2 | Blinding 0    | Patients 1 |
| Longhitano <sup>71</sup>      | Retrospective cohort study  | ICU                      | ****            | **            | **         |
| Longhitano <sup>72</sup>      | Prospective cohort study    | Non-ICU                  | ****            | *             | **         |
| Melazzini <sup>73</sup>       | Retrospective cohort study  | Hospitalized             | ****            | **            | **         |
| Mouhat <sup>74</sup>          | Retrospective cohort study  | Hospitalized             | ***             | *             | **         |
| Nadeem <sup>75</sup>          | Retrospective cohort study  | ICU                      | ****            | **            | **         |
| Pancani <sup>76</sup>         | Prospective cohort study    | Non-ICU                  | ***             | *             | **         |
| Pavoni <sup>77</sup>          | Retrospective cohort study  | ICU                      | ****            | **            | **         |
| Piazza <sup>78</sup>          | Retrospective cohort study  | Hospitalized             | ****            | **            | **         |
| Pizzi <sup>79</sup>           | Retrospective cohort study  | Non-ICU                  | ***             | **            | **         |
| Prandoni <sup>80</sup>        | Retrospective cohort study  | Non-ICU                  | ***             | **            | *          |
| Soumagne <sup>281</sup>       | Retrospective cohort study  | ICU, with CTPA           | ***             | *             | **         |
| Torres-Machorro <sup>82</sup> | Prospective cohort study    | ICU                      | ***             | *             | **         |
| Al-samkari <sup>283</sup>     | Retrospective cohort study  | ICU                      | ****            | **            | **         |
| berg <sup>84</sup>            | Retrospective cohort study  | Hospitalized             | ****            | **            | **         |
| Marquez <sup>85</sup>         | Prospective cohort study    | Hospitalized             | ****            | **            | **         |
| Tan <sup>86</sup>             | Retrospective cohort study  | Hospitalized             | ****            | **            | **         |
| Warrior <sup>87</sup>         | Prospective cohort study    | Hospitalized             | ****            | **            | **         |
| Theprungirikul <sup>88</sup>  | Retrospective cohort study  | Hospitalized             | ****            | **            | **         |
| Camille <sup>89</sup>         | Retrospective cohort study  | ICU                      | ****            | **            | **         |
| Kodama <sup>90</sup>          | Retrospective cohort study  | Hospitalized             | ****            | **            | **         |
| Jiménez-Soto <sup>91</sup>    | Cross sectional study       | Hospitalized             | ****            | **            | **         |

## References

- Al-Samkari H, Karp Leaf RS, Dzik WH, et al. COVID-19 and coagulation: bleeding and thrombotic manifestations of SARS-CoV-2 infection. *Blood* 2020;136(04):489–500
- Artifoni M, Danic G, Gautier G, et al. Systematic assessment of venous thromboembolism in COVID-19 patients receiving thromboprophylaxis: incidence and role of D-dimer as predictive factors. *J Thromb Thrombolysis* 2020;50(01):211–216
- Beun R, Kusadasi N, Sikma M, Westerink J, Huisman A. Thromboembolic events and apparent heparin resistance in patients infected with SARS-CoV-2. *Int J Lab Hematol* 2020;42 (Suppl 1):19–20
- Bilaloglu S, Aphinyanaphongs Y, Jones S, Iturrate E, Hochman J, Berger JS. Thrombosis in Hospitalized Patients With COVID-19 in a New York City Health System. *JAMA* 2020;324(08):799–801
- Bompard F, Monnier H, Saab I, et al. Pulmonary embolism in patients with COVID-19 pneumonia. *Eur Respir J* 2020;56(01):17–20
- Chen S, Zhang D, Zheng T, Yu Y, Jiang J. DVT incidence and risk factors in critically ill patients with COVID-19. *J Thromb Thrombolysis* 2020;•••:1–7
- Cui S, Chen S, Li X, Liu S, Wang F. Prevalence of venous thromboembolism in patients with severe novel coronavirus pneumonia. *J Thromb Haemost* 2020;18(06):1421–1424
- Demelo-Rodríguez P, Cervilla-Muñoz E, Ordieres-Ortega L, et al. Incidence of asymptomatic deep vein thrombosis in patients with COVID-19 pneumonia and elevated D-dimer levels. *Thromb Res* 2020;192(January):23–26
- Desborough MJR, Doyle AJ, Griffiths A, Retter A, Breen KA, Hunt BJ. Image-proven thromboembolism in patients with severe COVID-19 in a tertiary critical care unit in the United Kingdom. *Thromb Res* 2020;193:1–4
- Dubois-Silva Á, Barbagelata-López C, Mena Á, Piñeiro-Parga P, Llinares-García D, Freire-Castro S. Pulmonary embolism and screening for concomitant proximal deep vein thrombosis in noncritically ill hospitalized patients with coronavirus disease 2019. *Intern Emerg Med* 2020;15(05):865–870
- Fauvel C, Weizman O, Trimaille A, et al; Critical Covid-19 France Investigators. Pulmonary embolism in COVID-19 patients: a French multicentre cohort study. *Eur Heart J* 2020;41(32):3058–3068
- Freund Y, Drogrey M, Miró Ò, et al. Association between Pulmonary Embolism and COVID-19 in ED patients Undergoing CTPA: the PEPCOV international retrospective study. *Acad Emerg Med* 2020;27:811–820
- Fraissé M, Logre E, Pajot O, Mentec H, Plantefève G, Contou D. Thrombotic and hemorrhagic events in critically ill COVID-19 patients: a French monocenter retrospective study. *Crit Care* 2020;24(01):275
- Gervaise A, Bouzad C, Peroux E, Helissey C. Acute pulmonary embolism in non-hospitalized COVID-19 patients referred to CTPA by emergency department. *Eur Radiol* 2020;30(11):6170–6177
- Helms J, Tacquard C, Severac F, et al; CRICS TRIGGERSEP Group (Clinical Research in Intensive Care and Sepsis Trial Group for Global Evaluation and Research in Sepsis) High risk of thrombosis in patients with severe SARS-CoV-2 infection: a multicenter prospective cohort study. *Intensive Care Med* 2020;46(06):1089–1098
- Hippensteel JA, Burnham EL, Jolley SE. Prevalence of venous thromboembolism in critically ill patients with COVID-19. *Br J Haematol* 2020;190(03):e134–e137
- Klok FA, Kruij MJHA, van der Meer NJM, et al. Confirmation of the high cumulative incidence of thrombotic complications in critically ill ICU patients with COVID-19: An updated analysis. *Thromb Res* 2020;191:148–150
- Koleilat I, Galen B, Choinski K, et al. Clinical characteristics of acute lower extremity deep venous thrombosis diagnosed by duplex in patients hospitalized for coronavirus disease 2019. *J Vasc Surg Venous Lymphat Disord* 2021;9(01):36–46
- Larsen K, Coolen-Allou N, Masse L, et al. Detection of Pulmonary Embolism in Returning Travelers with Hypoxemic Pneumonia due to COVID-19 in Reunion Island. *Am J Trop Med Hyg* 2020;103(02):844–846
- Litjos JF, Leclerc M, Chochois C, et al. High incidence of venous thromboembolic events in anticoagulated severe COVID-19 patients. *J Thromb Haemost* 2020;18(07):1743–1746
- Lodigiani C, Iapichino G, Carenzo L, et al; Humanitas COVID-19 Task Force. Venous and arterial thromboembolic complications in COVID-19 patients admitted to an academic hospital in Milan, Italy. *Thromb Res* 2020;191:9–14
- Longchamp A, Longchamp J, Manzocchi-Besson S, et al. Venous thromboembolism in critically ill patients with COVID-19: Results of a screening study for deep vein thrombosis. *Res Pract Thromb Haemost* 2020;4(05):842–847
- Mestre-Gómez B, Lorente-Ramos RM, Rogado J, et al. Incidence of pulmonary embolism in non-critically ill COVID-19 patients. Predicting factors for a challenging diagnosis. *J Thromb Thrombolysis* 2020;•••:2–8
- Monfardini L, Morassi M, Botti P, et al. Pulmonary thromboembolism in hospitalised COVID-19 patients at moderate to high risk by Wells score: a report from Lombardy, Italy. *Br J Radiol* 2020;93(1113):20200407
- Nahum J, Morichau-Beauchant T, Daviaud F, et al. Venous Thrombosis Among Critically Ill Patients With Coronavirus Disease 2019 (COVID-19). *JAMA Netw Open* 2020;3(05):e2010478
- Patell R, Bogue T, Bindal P, et al. Incidence of thrombosis and hemorrhage in hospitalized cancer patients with COVID-19. *J Thromb Haemost* 2020;18(09):2349–2357
- Poissy J, Goutay J, Caplan M, et al; Lille ICU Haemostasis COVID-19 Group. Pulmonary Embolism in Patients With COVID-19: Awareness of an Increased Prevalence. *Circulation* 2020;142(02):184–186
- Poyiadji N, Cormier P, Patel PY, et al. Acute Pulmonary Embolism and COVID-19. *Radiology* 2020;297(03):E335–E338
- Rieder M, Goller I, Jeserich M, et al. Rate of venous thromboembolism in a prospective all-comers cohort with COVID-19. *J Thromb Thrombolysis* 2020;50(03):558–566
- Ren B, Yan F, Deng Z, et al. Extremely High Incidence of Lower Extremity Deep Venous Thrombosis in 48 Patients With Severe COVID-19 in Wuhan. *Circulation* 2020;142(02):181–183
- Santoliquido A, Porfidia A, Nesci A, et al; GEMELLI AGAINST COVID-19 Group. Incidence of deep vein thrombosis among non-ICU patients hospitalized for COVID-19 despite pharmacological thromboprophylaxis. *J Thromb Haemost* 2020;18(09):2358–2363
- Soumagne T, Lascarrou JB, Hraiech S, et al. Factors Associated With Pulmonary Embolism Among Coronavirus Disease 2019 Acute Respiratory Distress Syndrome: A Multicenter Study Among 375 Patients. *Crit Care Explor* 2020;2(07):e0166
- Stoneham SM, Milne KM, Nuttall E, et al. Thrombotic risk in COVID-19: a case series and case-control study. *Clin Med (Lond)* 2020;20(04):e76–e81
- Trigonis RA, Holt DB, Yuan R, et al. Incidence of Venous Thromboembolism in Critically Ill Coronavirus Disease 2019 Patients Receiving Prophylactic Anticoagulation. *Crit Care Med* 2020;48(09):e805–e808
- Trimaille A, Curtiaud A, Marchandot B, et al. Venous thromboembolism in non-critically ill patients with COVID-19 infection. *Thromb Res* 2020;193:166–169
- Voicu S, Bonnin P, Stéphanian A, et al. High Prevalence of Deep Vein Thrombosis in Mechanically Ventilated COVID-19 Patients. *J Am Coll Cardiol* 2020;76(04):480–482

- 37 Whyte MB, Kelly PA, Gonzalez E, Arya R, Roberts LN. Pulmonary embolism in hospitalised patients with COVID-19. *Thromb Res* 2020;195:95–99
- 38 Zerwes S, Hernandez Cancino F, Liebetau D, et al. [Increased risk of deep vein thrombosis in intensive care unit patients with CoVID-19 infections?—Preliminary data] *Chirurg* 2020;91(07):588–594
- 39 Zhang L, Feng X, Zhang D, et al. Deep Vein Thrombosis in Hospitalized Patients With COVID-19 in Wuhan, China: Prevalence, Risk Factors, and Outcome. *Circulation* 2020;142(02):114–128
- 40 Maatman TK, Jalali F, Feizpour C, et al. Routine Venous Thromboembolism Prophylaxis May Be Inadequate in the Hypercoagulable State of Severe Coronavirus Disease 2019. *Crit Care Med* 2020;48(09):e783–e790
- 41 Thomas W, Varley J, Johnston A, et al. Thrombotic complications of patients admitted to intensive care with COVID-19 at a teaching hospital in the United Kingdom. *Thromb Res* 2020;191:76–77
- 42 Grillet F, Behr J, Calame P, Aubry S, Delabrousse E. Acute Pulmonary Embolism Associated with COVID-19 Pneumonia Detected with Pulmonary CT Angiography. *Radiology* 2020;296(03):E186–E188
- 43 Alharthy A, Faqih F, Abuhamdah M, et al. Prospective Longitudinal Evaluation of Point-of-Care Lung Ultrasound in Critically Ill Patients With Severe COVID-19 Pneumonia. *J Ultrasound Med* 2020;2019:1–14
- 44 Hanif A, Khan S, Mantri N, et al. Thrombotic complications and anticoagulation in COVID-19 pneumonia: a New York City hospital experience. *Ann Hematol* 2020;99(10):2323–2328
- 45 Le Jeune S, Suhl J, Benainous R, et al. High prevalence of early asymptomatic venous thromboembolism in anticoagulated COVID-19 patients hospitalized in general wards. *J Thromb Thrombolysis* 2020
- 46 Léonard-Lorant I, Delabranche X, Séverac F, et al. Acute Pulmonary Embolism in Patients with COVID-19 at CT Angiography and Relationship to d-Dimer Levels. *Radiology* 2020;296(03):E189–E191
- 47 Aleva FE, van Mourik L, Broeders MEAC, Paling AJ, de Jager CPC. COVID-19 in critically ill patients in North Brabant, the Netherlands: Patient characteristics and outcomes. *J Crit Care* 2020;60(January):111–115
- 48 Ierardi AM, Coppola A, Fusco S, et al. Early detection of deep vein thrombosis in patients with coronavirus disease 2019: who to screen and who not to with Doppler ultrasound? *J Ultrasound* 2020;1–9
- 49 Bavaro DF, Poliseno M, Scardapane A, et al. Occurrence of Acute Pulmonary Embolism in COVID-19—A case series. *Int J Infect Dis* 2020;98(January):225–226
- 50 Criel M, Falter M, Jaeken J, et al. Venous thromboembolism in SARS-CoV-2 patients: only a problem in ventilated ICU patients, or is there more to it? *Eur Respir J* 2020;56(01):8–11
- 51 Mattioli M, Benfaremo D, Mancini M, et al. Safety of intermediate dose of low molecular weight heparin in COVID-19 patients. *J Thromb Thrombolysis* 2020;19(0123456789)
- 52 Middeldorp S, Coppens M, van Haaps TF, et al. Incidence of venous thromboembolism in hospitalized patients with COVID-19. *J Thromb Haemost* 2020;18(08):1995–2002
- 53 Piagnerelli M, Cauchie P, Vancutsem M, et al. Thromboprophylaxis in Critically Ill Coronavirus Disease 2019 Patients. *Crit Care Explor* 2020;2(08):e0177
- 54 Stessel B, Vanvuchelen C, Bruckers L, et al. Impact of implementation of an individualised thromboprophylaxis protocol in critically ill ICU patients with COVID-19: A longitudinal controlled before-after study. *Thromb Res* 2020;194:209–215
- 55 Taccone FS, Gevenois PA, Peluso L, et al. Higher Intensity Thromboprophylaxis Regimens and Pulmonary Embolism in Critically Ill Coronavirus Disease 2019 Patients. *Crit Care Med* 2020;48(11):e1087–e1090
- 56 Tavazzi G, Civardi L, Caneva L, Mongodi S, Mojoli F. Thrombotic events in SARS-CoV-2 patients: an urgent call for ultrasound screening. *Intensive Care Med* 2020;46(06):1121–1123
- 57 Bi Q, Hong C, Meng J, et al. Characterizing clinical progression of COVID-19 among patients in Shenzhen, China: an observational cohort study. *medRxiv* 2020:2020.04.22.20076190-2020.04.22
- 58 Marco C, Elena M, Bertinato S, et al. Pulmonary Embolism or Pulmonary Thrombosis in COVID-19? Is the Recommendation to Use High-Dose Heparin for Thromboprophylaxis Justified. *Thromb Res* 2020;120(08):1230–1232
- 59 Galeano-Valle F, Oblitas CM, Ferreiro-Mazón MM, et al. Antiphospholipid antibodies are not elevated in patients with severe COVID-19 pneumonia and venous thromboembolism. *Thromb Res* 2020;192(January):113–115
- 60 Grandmaison G, Andrey A, Périard D, et al. Systematic Screening for Venous Thromboembolic Events in COVID-19 Pneumonia. *TH Open* 2020;4(02):e113–e115
- 61 Giorgi-Pierfranceschi M, Paoletti O, Pan A, et al. Prevalence of asymptomatic deep vein thrombosis in patients hospitalized with SARS-CoV-2 pneumonia: a cross-sectional study. *Intern Emerg Med* 2020;15(08):1425–1433
- 62 Contou D, Pajot O, Cally R, et al. Pulmonary embolism or thrombosis in ARDS COVID-19 patients: A French monocenter retrospective study. *PLoS One* 2020;15(08):e0238413
- 63 Alonso-Fernández A, Toledo-Pons N, Cosío BG, et al. Prevalence of pulmonary embolism in patients with COVID-19 pneumonia and high D-dimer values: A prospective study. *PLoS One* 2020;15(08):e0238216
- 64 Benito N, Filella D, Mateo J, et al. Pulmonary Thrombosis or Embolism in a Large Cohort of Hospitalized Patients With Covid-19. *Front Med (Lausanne)* 2020;7(August):557
- 65 Atallah B, Sadik ZG, Salem N, et al. The impact of protocol-based high-intensity pharmacological thromboprophylaxis on thrombotic events in critically ill COVID-19 patients. *Anaesthesia* 2020
- 66 Avruscio G, Camporese G, Campello E, et al. COVID-VTE Study Group. COVID-19 and Venous Thromboembolism in Intensive Care or Medical Ward. *Clin Transl Sci* 2020;13(06):1108–1114
- 67 Choi JJ, Wehmeyer GT, Li HA, et al. D-dimer cut-off points and risk of venous thromboembolism in adult hospitalized patients with COVID-19. *Thromb Res* 2020;196:318–321
- 68 Hill JB, Garcia D, Crowther M, et al. Frequency of venous thromboembolism in 6513 patients with COVID-19: a retrospective study. *Blood Adv* 2020;4(21):5373–5377
- 69 Jimenez-Guiu X, Huici-Sánchez M, Romera-Villegas A, Izquierdo-Miranda A, Sancho-Cerro A, Vila-Coll R. Deep vein thrombosis in non-critically ill patients with coronavirus disease 2019 pneumonia: deep vein thrombosis in non-intensive care unit patients. *J Vasc Surg Venous Lymphat Disord* 2020:S2213-333X(20)30466-2
- 70 Lemos ACB, do Espírito Santo DA, Salvetti MC, et al. Therapeutic versus prophylactic anticoagulation for severe COVID-19: A randomized phase II clinical trial (HESACOVID). *Thromb Res* 2020;196:359–366
- 71 Longhitano Y, Racca F, Zanza C, et al. Venous thromboembolism in critically ill patients affected by ARDS related to COVID-19 in Northern-West Italy. *Eur Rev Med Pharmacol Sci* 2020;24(17):9154–9160
- 72 Longhitano Y, Racca F, Zanza C, et al. Venous Thrombo-Embolic in Hospitalized SARS-CoV-2 Patients Treated with Three Different Anticoagulation Protocols: Prospective Observational Study. *Biology (Basel)* 2020;9(10):E310
- 73 Melazzini F, Colaneri M, Fumoso F, et al. San Matteo Pavia COVID-19 Task Force. Venous thromboembolism and COVID-19: a single center experience from an academic tertiary referral hospital of Northern Italy. *Intern Emerg Med* 2020
- 74 Mouhat B, Besutti M, Bouiller K, et al. Elevated D-dimers and lack of anticoagulation predict PE in severe COVID-19 patients. *Eur Respir J* 2020;56(04):2001811

- 75 Nadeem R, Thomas SJ, Fathima Z, et al. Pattern of anticoagulation prescription for patients with Covid-19 acute respiratory distress syndrome admitted to ICU. Does it impact outcome? *Heart Lung* 2021;50(01):1–5
- 76 Pancani R, Villari L, Foci V, et al. Lower limb deep vein thrombosis in COVID-19 patients admitted to intermediate care respiratory units. *Thromb Res* 2021;197(197):44–47
- 77 Pavoni V, Giancesello L, Pazzi M, Stera C, Meconi T, Frigieri FC. Venous thromboembolism and bleeding in critically ill COVID-19 patients treated with higher than standard low molecular weight heparin doses and aspirin: A call to action. *Thromb Res* 2020;196:313–317
- 78 Piazza G, Campia U, Hurwitz S, et al. Registry of Arterial and Venous Thromboembolic Complications in Patients With COVID-19. *J Am Coll Cardiol* 2020;76(18):2060–2072
- 79 Pizzi R, Gini G, Caiano L, et al. Coagulation parameters and venous thromboembolism in patients with and without COVID-19 admitted to the Emergency Department for acute respiratory insufficiency. *Thromb Res* 2020;196(December):209–212
- 80 Prandoni P, Cattelan AM, Carrozzi L, et al; FONDACOVIT Investigators [all in Italy]. The hazard of fondaparinux in non-critically ill patients with COVID-19: Retrospective controlled study versus enoxaparin. *Thromb Res* 2020;196:395–397
- 81 Soumagne T, Winiszewski H, Besch G, et al. Pulmonary embolism among critically ill patients with ARDS due to COVID-19. *Respir Med Res* 2020;78:100789
- 82 Torres-Machorro A, Anguiano-Álvarez VM, Grimaldo-Gómez FA, et al. Asymptomatic deep vein thrombosis in critically ill COVID-19 patients despite therapeutic levels of anti-Xa activity. *Thromb Res* 2020;196:268–271
- 83 Al-Samkari HGS, Karp Leaf R, Wang W, Rosovsky R, Bauer K, Leaf D. STOP-COVID Investigators. Thrombosis, Bleeding, and the Effect of Anticoagulation on Survival in Critically Ill Patients with COVID-19 in the United States. . [abstract]*Res Pract Thromb Haemost* 2020;4(Suppl 1)
- 84 Berg S, Kim S-H, Patel S, et al. Real World Outcomes of Sars-Cov-2 Thrombosis Rates across Three University Health Systems in the Chicago Metropolitan Area. *Blood* 2020;136(Suppl 1):58–59
- 85 Marquez FG, Riviello-Goya S, Vargas Ruiz AG, et al. Low Rate of Thrombosis in Mexican Patients with COVID-19 Infection. a Benefit of Higher Doses Anticoagulants or a Sub Diagnosis? *Blood* 2020;136(Suppl 1):29–30
- 86 Tan JY, Tan CW, Wong WH, et al. Thrombotic Events in COVID-19 Patients and Its Comparison with Other Non-Sars-Cov-2 Respiratory Viruses. *Blood* 2020;136(Suppl 1):25–26
- 87 Warrior S, Behrens E, Thomas J, et al. Impact of Treatment and Anticoagulation on Thrombosis in COVID-19 Patients. *Blood* 2020;136(Suppl 1):6–7
- 88 Theprungsirikul PP, Saith SE. Incidence of Thrombosis and Associated Risk Factors in Hospitalized COVID-19 Patients in a New York City Hospital System. *Blood* 2020;136(Suppl 1):32–33
- 89 Camille S, Koolian M, Escobar D, et al. Thrombotic Complications in a Canadian Population of Critically Ill Patients with COVID-19. *Blood* 2020;136(Suppl 1):41–42
- 90 Kodama R, Kalsi A, Singh A, et al. Outcomes in COVID-19 Patients on Treatment Dose Anti-Coagulation Compared to Prophylactic Dose Anti-Coagulation. *Blood* 2020;136(Suppl 1):40–41
- 91 Jiménez-Soto R, Aguilar-Soto M, Demichelis R. The Impact of Different Prophylactic Anticoagulation Doses on the Outcomes of Patients with COVID-19. *Blood* 2020;136(Suppl 1):17
